# Supplementary material
Source: PubMed Central journal article supplement (PMC3338969)

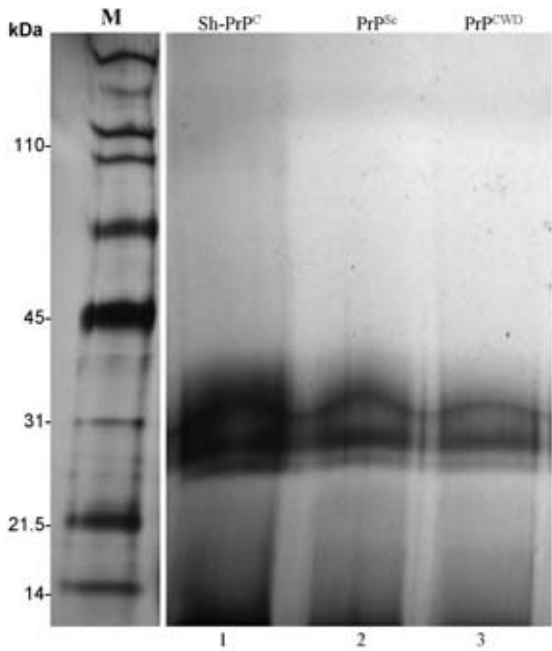

Supplement: prion0601_0081SD1.pdf [file prion0601_0081SD1.pdf]
